# Supplementary material
Source: PubMed Central journal article supplement (PMC4528509)
Supplement: rspb20150659supp1.pdf [file rspb20150659supp1.pdf]

# Homeobox transcription factor Six7 governs expression of green opsin genes in zebrafish

Yohey Ogawa, Tomoya Shiraki, Daisuke Kojima and Yoshitaka Fukada

## Supplementary information

### Supplementary methods

#### (1) Construction of TALEN targeting-vector

For construction of pTAL7DD and pTAL7RR vectors, a sequence encoding the TAL effector and the *FokI* nuclease catalytic domain was amplified from the pTAL3 by PCR and then cloned between *Bam*HI and *Eco*RI site of pCS2(+) vector. The N-terminal and C-terminal regions of the TAL effector were truncated based on pCS2TAL3DD and pCS2TAL3RR [1]. The sequence encoding the FLAG tag was inserted into the N-terminus of TAL effector in order to confirm the expression of TALENs by Western blot analysis. The resulting pTAL7DR was further modified by PCR for generation of pTAL7RR and pTAL7DD, the nucleotide sequence of which is shown in Supplementary material 1. A pair of pTAL7DD and pTAL7RR express a DD-RR heterodimeric form of the *FokI* nuclease catalytic domain, and this form was previously reported to have reduced homodimeric cleavage activity, thereby decreasing toxicity of zinc finger nucleases [2].

## (2) Generation of mutant zebrafish

To generate *six7* mutant zebrafish, TALEN mRNA was synthesized from the pTAL7DD and pTAL7RR by *in vitro* transcription using the SP6 mMACHINE Kit (AM13140, Ambion), and purified with the RNeasy Mini kit (74104, Qiagen). Aqueous solution containing ~200 pg each of the two TALEN mRNAs and 0.05% phenol red were injected into the cytoplasm of the one cell-stage zebrafish embryos. Fish (F<sub>0</sub>) obtained from the injected animals were crossed with wild-type zebrafish, and the resulting F<sub>1</sub> fish were screened for the presence of TALEN-induced mutations by a combination of PCR and subsequent digestion by endonuclease *Xho*I: first, the region surrounding the TALEN cleavage site was amplified by PCR using the primers, six7TALEN\_Fw and six7TALEN\_Rv (Supplementary table 1). Second, the PCR product was digested by *Xho*I, and TALEN-induced mutations were examined by sensitivities to the *Xho*I digestion (figure 3a). To sequence-verify mutations, the PCR products having no *Xho*I site were then subjected to the second round of PCR using the other primer set, DS\_six7TALEN\_Fw and DS\_six7TALEN\_Rv. The nested PCR products were digested by *Xho*I again, and then sequenced directly. After verification of the mutations, we used zebrafish having the mutant allele (*six7*<sup>ja51</sup>) described in figure 3a for all the experiment except for figure S1. Genotypes were determined by PCR with two pairs of specific primers, (i) DS\_six7TALEN\_Fw and DS\_six7TALEN\_Rv, (ii) six7TALEN\_Fw2WT and six7TALEN\_Rv3mut (Supplementary table 1) (figure 3b). Before the experiment in figure 3, the larvae were dissected into anterior and posterior segments; the posterior ones were used for the genotyping, while the anterior segments were soaked in RNA*later*

(R0901, Sigma) for extracting RNA or soaked in 4% paraformaldehyde in Ca<sup>2+</sup>- and Mg<sup>2+</sup>-free Dulbecco's PBS (D-PBS) for preparing cryosections.

The *six3b* mutant zebrafish was generated as described above for the *six7* mutant. Briefly, the TAL effector repeats recognizing exon 1 of zebrafish *six3b* gene were constructed with the Golden Gate method. These repeats were cloned into pTAL7DD and pTAL7RR vectors. Aqueous solution containing ~300-pg each of the two TALEN mRNAs and 0.05% phenol red were injected into the cytoplasm of the one cell-stage zebrafish embryos. Fish (F<sub>0</sub>) obtained from the injected animals were crossed with wild-type zebrafish, and the resultant F<sub>1</sub> fish were screened for the presence of TALEN-induced mutations by a combination of PCR and subsequent digestion by endonuclease *Hind*III. After the isolation of the mutant zebrafish and verifying mutations in the *six3b* gene locus, genotypes were determined by a combination of PCR and subsequent digestion by endonuclease *Hind*III (figure S1d). First, the region flanking the TALEN cleavage site was amplified by PCR using the following primers, six3bTALEN\_Fw (5'-GACACCAGGAAGACCAATAG -3') and six3bTALEN\_Rv (5'-TACCACTCCCTCAACAAACC -3'). Second, the PCR product was digested with *Hind*III, and TALEN-induced mutations were checked by loss of the *Hind*III digestion site. The obtained *six3b*<sup>ja53/+</sup> fish were crossed with *six7*<sup>ja52/+</sup> fish to generate *six7*<sup>ja52/+</sup>; *six3b*<sup>ja53/+</sup> fish. Then, the resulting fish were crossed with each other to generate *six7* and/or *six3b* knock-out zebrafish, which were used for the experiments performed in figure S1e.

### **(3) Immunohistochemistry**

The adult eyes were isolated from the light-adapted adult zebrafish. After removal of the lenses, the eyes were fixed in 4% paraformaldehyde in D-PBS overnight at 4°C. After several washes with D-PBS, the fixed eyes were immersed successively in 5%, 10% and 15% sucrose (w/v) in D-PBS for 30 min each at room temperature and finally immersed in 20% (w/v) sucrose in D-PBS overnight at 4°C. The embryos were fixed in 4% paraformaldehyde in D-PBS overnight at 4°C and immersed in 20% sucrose (w/v) in D-PBS overnight at 4°C. The cryoprotected samples of the adult eyes and embryos were embedded in a 2:1 solution of 20% sucrose in D-PBS and Tissue-Tek O.C.T Compound (Tissue-Tek, SAKURA), frozen, and sectioned at 10- $\mu$ m thickness with cryostat (CM3000, Leica). The sections on the glass slides were rinsed with PBS (10 mM Na-phosphate buffer, 140 mM NaCl, 1 mM MgCl<sub>2</sub>, pH 7.4), pretreated with a blocking solution (3% goat normal serum, 0.1% Triton X-100 in PBS) for 1 hr at room temperature, and then incubated with a primary antibody diluted in the blocking solution overnight at 4°C. After washed with PBS, the sections were treated with the blocking solution for 15 min at room temperature, and then with a secondary antibody for 4 hr at room temperature. After washed with PBS, the sections were coverslipped with VECTASHIELD Mounting Medium with DAPI (H-1200, Vector Laboratories) for staining of the cell nuclei. The primary antibodies used were mouse monoclonal antibody Zpr1 (diluted 1:400, Zebrafish International Resource Center, Eugene) directed to double cones (green and red cones), rabbit polyclonal antibody to rod transducin  $\alpha$ -subunit, Gnat1 (diluted to 0.5  $\mu$ g/ml, sc-389, Santa Cruz), mouse polyclonal antibody to rhodopsin (diluted

1:400, self-produced antibody) and rabbit polyclonal antibody to cone transducin  $\alpha$ -subunit, Gnat2 (diluted 1:800, PM075, MBL). The secondary antibodies used were goat anti-mouse IgG antibody conjugated with Alexa-568 (A-11004, diluted to 2  $\mu$ g/ml, Molecular Probes) and goat anti-rabbit IgG antibody conjugated with Alexa-488 (A-11034, diluted to 2  $\mu$ g/ml, Molecular Probes). The immuno-stained sections were observed with a confocal laser scanning microscope (TCS SP8, Leica).

Whole-mount immunohistochemistry was conducted as described previously [3] with some modifications. The adult retinas were isolated from the dark-adapted adult zebrafish. The isolated retinas were fixed in 4% paraformaldehyde in D-PBS for 3 hr at 4°C. After several washes with 0.1% Triton-X100 in PBS (PBST2), the specimens were treated with 0.5% Triton-X100 in PBS for 30 min at room temperature, and subsequently washed with PBST2. The specimens were incubated in a blocking solution (2% goat normal serum, 1% Dimethyl sulfoxide in PBST2) for 1 hr at room temperature, and then with a primary antibody diluted in the blocking solution overnight at 4°C. Following several washes with PBST2, the samples were treated with the blocking solution for 1 hr at room temperature, and then with a secondary antibody for 4 hr at room temperature. After washed with PBST2, the treated retinas were mounted on a glass slide and coverslipped with VECTASHIELD Mounting Medium with DAPI (H-1200, Vector Laboratories) for staining of the cell nuclei. The primary antibodies used were mouse monoclonal antibody 1D4 (diluted to 7  $\mu$ g/ml), which specifically recognized red cone opsins in zebrafish, and rabbit polyclonal antibody to cone transducin  $\alpha$ -subunit, Gnat2 (diluted 1:400, PM075, MBL). The

secondary antibodies used were goat anti-mouse IgG antibody conjugated with Alexa-568 (A-11004, diluted to 4 µg/ml, Molecular Probes) and goat anti-rabbit IgG antibody conjugated with Alexa-488 (A-11034, diluted to 4 µg/ml, Molecular Probes). The immuno-stained retinas were observed with a confocal laser scanning microscope (TCS SP8, Leica).

#### **(4) *In situ* hybridization**

To prepare RNA probes, the DNA fragments of zebrafish *six7* and various visual opsin genes were amplified by PCR from adult zebrafish retinal cDNAs with primers listed in Supplementary table 2. To distinguish different types of duplicated green and red opsin genes, RNA probes were designed to recognize each 3' UTR region of duplicated opsin genes according to the previous study [4]. The amplified cDNA fragments were cloned into pGEM15H vector [5] or into pCR4Blunt-TOPO (K2875-20SP, Life Technologies). The resultant plasmids were linearized with appropriate restriction enzymes, and then transcribed into digoxigenin (DIG)-labelled RNA with DIG RNA labelling kit SP6/T7 (1175025, Roche) and/or with T3 RNA polymerase (1163001, Roche). The *lws* cRNA probe used in figure 3f was designed in the coding region of *lws1* to visualize *lws1* and *lws2* mRNAs.

Whole-mount *in situ* hybridization was performed as described previously [3] with some modifications. Briefly, larval zebrafish were fixed in 4% paraformaldehyde in D-PBS overnight at 4°C, dehydrated through a methanol series and stored in 100% methanol at -20°C. The samples were rehydrated and pre-treated with proteinase K (5 µg/ml in PBST, 0.1% Tween 20 in D-PBS) for 12

min [for the larvae at 1.5 days post fertilization (dpf)], for 20 min (for the 2-dpf and 2.5-dpf larvae) or for 30 min (for the 3.5-dpf larvae). The larvae were hybridized with the DIG-labelled RNA probes, and the hybridization signals were visualized by NBT/BCIP staining. Hybridization and post-hybridization washes were performed at 65°C. After staining, the specimens were washed sequentially with 30% and 75% methanol in PBST for 5 min each and washed twice in 100% methanol. The staining reaction was terminated by fixation in 4% paraformaldehyde in PBST. Then, the specimens were immersed sequentially in 30%, 50% and 70% glycerol in PBST for 5 min each, and subjected to examination with a stereoscopic microscope (MZ-FL3, Leica).

*In situ* hybridization using larval and adult ocular sections was carried out essentially as described previously [5,6][6,5]. In short, the 10- $\mu$ m frozen ocular sections were prepared in a similar manner to immunohistochemistry. These sections were pre-treated with proteinase K and hybridized with the DIG-labelled RNA probes, and the hybridization signals were visualized by NBT/BCIP staining. Hybridization and post-hybridization washes were performed at 65°C. The treated samples were examined with a microscope, Axioplan2 (Carl Zeiss) or BZ-9000 Generation II (Keyence).

##### **(5) Isolation of rods and cones**

Retinas were dissected in ice-cold PBS from dark-adapted adult fish of *Tg(rho:egfp)<sup>ja2</sup>* [7] or *Tg(gnat2:egfp)<sup>ja23</sup>* transgenic lines. *Tg(rho:egfp)<sup>ja2</sup>* fish express enhanced green fluorescent proteins (EGFP) in rods, while *Tg(gnat2:egfp)<sup>ja23</sup>* express EGFP in all the cone subtypes. The *Tg(gnat2:egfp)<sup>ja23</sup>*

line was generated according to the method described in the previous study [8]. The dissected retinas were digested with 0.25% trypsin, 10 U/ml DNaseI, 2 mM MgCl<sub>2</sub> and 2 mM EGTA in Ca<sup>2+</sup>-free Ringer's solution (5 mM HEPES, 116 mM NaCl, 2.9 mM KCl, pH7.2) for 30 min at 37°C. The reaction was terminated by the addition of an equal volume of PBS containing 0.5% soybean trypsin inhibitor, 4 mM EDTA and 20% (v/v) fetal bovine serum. The sample was subjected to filtration through a 35-µm nylon mesh (352235, Falcon) and then to a fluorescence activating cell sorter (FACS Aria, BD Biosciences) to isolate EGFP-positive rods or cones. The cell sorting was conducted with gating based on the three parameters; forward scatter, side scatter and green fluorescence. The sorted cells containing EGFP-positive rods or cones were directly collected into 1.5 ml microtubes with the TRizol reagent (15596018, Life Technologies) for subsequent extraction of the total RNA. The extracted total RNA was purified and concentrated using the RNeasy MinElute Cleanup Kit (74204, Qiagen), and then reverse-transcribed with SuperScript II (18064, Life Technologies) by using anchored (dT)<sub>16</sub> primers. The cell purity was characterised by examining the expression levels of rod- and cone-specific genes by quantitative PCR (figure2a).

## **(6) Sequence alignment and phylogenetic analysis**

Amino acid sequences of the *sine oculis* homeobox (Six) protein family members and the green cone opsins (Rh2) were retrieved from the Ensembl genome browser (<http://www.ensembl.org>) from a representative selection of the vertebrate and invertebrate clades, which were listed in Supplementary table 4 and Supplementary table 5. Accession numbers are also listed in the



Supplementary tables. The amino acid sequences of SIX protein family members of elephant shark were obtained from the database of Elephant Shark Genome Project (<http://esharkgenome.imcb.a-star.edu.sg/>). *SIX7* candidates were identified in the NCBI genome database of green sea turtle and Indian python by tBLASTn searches using the sequence of green anole *SIX7* protein. SIX domain and homeodomain amino acid sequences (173, 143 amino acids for figure 1, S6a, respectively) were used for phylogenetic tree construction of the Six protein family. Full-length amino acid sequences without N- and C- terminal regions (about 310 amino acids) were used for phylogenetic tree construction of the teleost green opsins. The phylogenetic tree was constructed using the neighbor-joining method with 1,000 bootstrap replicates (CLC Main Workbench 6). Nematode CEH-34 was employed as an outgroup for Six family members, while spotted gar Rh2 was used as an outgroup for teleost green cone opsins.

To compare the synteny around the green cone opsin genes among vertebrate species, the adjacent genes were mapped onto the synteny regions by using the Ensembl genome browser.

## References

1. Dahlem, T. J., Hoshijima, K., Jurynek, M. J., Gunther, D., Starker, C. G., Locke, A. S., Weis, A. M., Voytas, D. F. & Grunwald, D. J. 2012 Simple methods for generating and detecting locus-specific mutations induced with TALENs in the zebrafish genome. *PLoS Genet.* **8**, e1002861. (doi:10.1371/journal.pgen.1002861)
2. Szczepek, M., Brondani, V., Büchel, J., Serrano, L., Segal, D. J. & Cathomen, T. 2007 Structure-based redesign of the dimerization interface reduces the toxicity of zinc-finger nucleases. *Nat. Biotechnol.* **25**, 786–93. (doi:10.1038/nbt1317)
3. Kojima, D., Torii, M., Fukada, Y. & Dowling, J. E. 2008 Differential expression of duplicated VAL-opsin genes in the developing zebrafish. *J. Neurochem.* **104**, 1364–71. (doi:10.1111/j.1471-4159.2007.05093.x)
4. Takechi, M. & Kawamura, S. 2005 Temporal and spatial changes in the expression pattern of multiple red and green subtype opsin genes during zebrafish development. *J. Exp. Biol.* **208**, 1337–45. (doi:10.1242/jeb.01532)
5. Mano, H., Kojima, D. & Fukada, Y. 1999 Exo-rhodopsin: a novel rhodopsin expressed in the zebrafish pineal gland. *Brain Res. Mol. Brain Res.* **73**, 110–8.
6. Barthel, L. K. & Raymond, P. A. 2000 In situ hybridization studies of retinal neurons. *Methods Enzymol.* **316**, 579–90.
7. Asaoka, Y., Mano, H., Kojima, D. & Fukada, Y. 2002 Pineal expression-promoting element (PIPE), a cis-acting element, directs pineal-specific gene expression in zebrafish. *Proc. Natl. Acad. Sci. U. S. A.* **99**, 15456–61. (doi:10.1073/pnas.232444199)
8. Kennedy, B. N., Alvarez, Y., Brockerhoff, S. E., Stearns, G. W., Sapetto-Rebow, B., Taylor, M. R. & Hurley, J. B. 2007 Identification of a zebrafish cone photoreceptor-specific promoter and genetic rescue of achromatopsia in the *nof* mutant. *Invest. Ophthalmol. Vis. Sci.* **48**, 522–9. (doi:10.1167/iovs.06-0975)
9. Amores, A., Catchen, J., Ferrara, A., Fontenot, Q. & Postlethwait, J. H. 2011 Genome evolution and meiotic maps by massively parallel DNA sequencing: Spotted gar, an outgroup for the teleost genome duplication. *Genetics* **188**, 799–808. (doi:10.1534/genetics.111.127324)

### Supplementary table 1.

Primers used for genotyping of *six7* knock-out zebrafish.

| Primer Name              | Primer sequence (5' to 3') |
|--------------------------|----------------------------|
| <i>six7</i> TALEN_Fw     | TCTGCTGCTCCTCCTTTAC        |
| <i>six7</i> TALEN_Rv     | CTTACGGATGCGGTA CTTC       |
| DS_ <i>six7</i> TALEN_Fw | CCGTTGGTTGTCCGTTACTC       |
| DS_ <i>six7</i> TALEN_Rv | GCAGTTTAGCGTGAGATTTCG      |
| <i>six7</i> TALEN_Fw2WT  | CCCGAGTGTGCGAGAATC         |
| <i>six7</i> TALEN_Rv3mut | GCTCGATATCTCCTGTTTTCC      |

### Supplementary table 2.

PCR primers used to amplify the target gene fragments for preparing cRNA probes.

| Target gene  | Forward (5' to 3')          | Reverse (5' to 3')          |
|--------------|-----------------------------|-----------------------------|
| <i>sws1</i>  | CCTCAGAGGTTTCCAGCAAG        | TTGGACAGGAGCAGACAGTG        |
| <i>sws2</i>  | GGGAGGTGACAAAGATGGTG        | ATGTT CAGCAAGCCAAGACC       |
| <i>rh2-1</i> | ATCTGCCTATTCAGTGCTCC        | TGGAATGCATGCTTTTATTTAA      |
| <i>rh2-2</i> | AACTAATTGCCAACTATGCTTTC     | TTTGAATGCATGTATTTATTATTCTAC |
| <i>rh2-3</i> | ACTTTTTGAACTTCTTTGTGG       | CACTTTTAATGCCAGTATTTATTC    |
| <i>rh2-4</i> | TCTTTTGA ACTTCTTTACAGGTTATG | TTTTTAATGCCGGTATTTATTTTC    |
| <i>lws1</i>  | AGTCAGACATGGGGAAAAG         | TACATGGGCAGGCATCTAC         |
| <i>lws2</i>  | TGAACAAGAGGGAAGA ACTG       | GTACAACATATCATTTTGCTGC      |
| <i>six7</i>  | TTGCTTATCTTTCCTTTAAT        | ACATCTAGCCTCTGTTTCCAAC      |

### Supplementary table 3.

Primers used for RT-qPCR.

| Target gene  | Forward (5' to 3')    | Reverse (5' to 3')      |
|--------------|-----------------------|-------------------------|
| <i>sws1</i>  | CGAGAGATATGTGGTCATCTG | TGTATCTGCTCCATCCAAAG    |
| <i>sws2</i>  | GGAGGAATGGTGAGTTTGTG  | GGTCTTGAAGGTAAAGTTCC    |
| <i>rh2-1</i> | GTAATGGAGGGATTCTTCGC  | TGGTCCGCAAGAGGTTTG      |
| <i>rh2-2</i> | GCGTGGGTAGATTAGTTGTG  | GGCTTATGCTCAGATTTAGTGG  |
| <i>rh2-3</i> | AGGAAACAAAACAGCATTG   | ATACAGTATAAATGACAGCCTTC |
| <i>rh2-4</i> | CTGAGAAATCTGGGCATCTG  | TGGCGGTAGAAAATATAAC     |
| <i>lws1</i>  | TACCTGGCCATCCATGCTG   | GGCGAAGAACGTGTAAGGAC    |
| <i>lws2</i>  | ATGCCTGCCTACTTTGCC    | CCAGTTCTTCCCTCTTGTTCC   |
| <i>rho</i>   | TCCGAGACCACACAGCG     | CTGCTTGTTTCATGCAGATG    |
| <i>gnat1</i> | AGATGCCAGGACCGTCAAAC  | CAAGGGAGTAACCATCTTTGTG  |
| <i>gnat2</i> | ATGCCGATAAGGAAGCCAAG  | ATAACCACCTTGATGGAGAATC  |
| <i>arr3a</i> | CTGATAAGCCTGTTCTTCTG  | GTGGTTTGGTCAACTGTAAC    |
| <i>arr3b</i> | GCAAGGCGTTGTTGTTTCC   | ATGTGAGGCTTCCCAAGAGTC   |
| <i>nr2e3</i> | TTCAGAGACCAGGTGATTC   | CAGTTGTCCAGAGGTAGAGAC   |
| <i>nrl</i>   | CTACAAACGTCTCCAGCACC  | AAGGCGAGGTGTTAGGATG     |
| <i>crx</i>   | CATAACTGGAGGGGAATCTG  | AAAGCACGACACAAGAAGTC    |
| <i>otx5</i>  | GAAGAAGTGGCTCTCAAGATC | AAACCAGACCTGGACTCTAGAC  |
| <i>tbx2b</i> | CGACTCTGATGCTTCCTCAAG | GTCCATTTCTGCTCGCTATC    |
| <i>six7</i>  | CTGCAGGACCCTTATCCAAAC | CATTCAGGAGAACTTCCAGAC   |
| <i>thrb</i>  | AACTTGGACGATTCAGAGGTG | TGAGCCACCTTGTGCTTACG    |
| <i>actb2</i> | GGCAATGAGAGGTTTCAGGTG | GTGGTACCACCAGACAATAC    |

#### Supplementary table 4.

Accession numbers used for alignment of the members of Six family.

| Vertebrate species                                       | Gene                             | Accession number   |                    |
|----------------------------------------------------------|----------------------------------|--------------------|--------------------|
| human ( <i>Homo sapiens</i> )                            | <i>SIX1</i>                      | ENSP00000247182    |                    |
|                                                          | <i>SIX2</i>                      | ENSP00000304502    |                    |
|                                                          | <i>SIX3</i>                      | ENSP00000260653    |                    |
|                                                          | <i>SIX4</i>                      | ENSP00000216513    |                    |
|                                                          | <i>SIX5</i>                      | ENSP00000316842    |                    |
|                                                          | <i>SIX6</i>                      | ENSP00000328596    |                    |
| Chinese soft-shell turtle ( <i>Pelodiscus sinensis</i> ) | <i>SIX2</i>                      | ENSPSIP00000009496 |                    |
|                                                          | <i>SIX3</i>                      | ENSPSIP00000009008 |                    |
|                                                          | <i>SIX6</i>                      | ENSPSIP00000016433 |                    |
|                                                          | <i>SIX7</i>                      | ENSPSIP00000016631 |                    |
| anole lizard ( <i>Anolis carolinensis</i> )              | <i>SIX7</i>                      | ENSACAP00000021004 |                    |
| green sea turtle ( <i>Chelonia mydas</i> )               | <i>SIX7</i>                      | XP_007057958.1     |                    |
| Indian python ( <i>Python molurus</i> )                  | <i>SIX7</i>                      | XP_007426202.1     |                    |
| coelacanth ( <i>Latimeria chalumnae</i> )                | <i>SIX1</i>                      | ENSLACP00000021104 |                    |
|                                                          | <i>SIX2</i>                      | ENSLACP00000015908 |                    |
|                                                          | <i>SIX3</i>                      | ENSLACP00000017069 |                    |
|                                                          | <i>SIX4</i>                      | ENSLACP00000021088 |                    |
|                                                          | <i>SIX5</i>                      | ENSLACP00000014916 |                    |
|                                                          | <i>SIX6</i>                      | ENSLACP00000021143 |                    |
|                                                          | zebrafish ( <i>Danio rerio</i> ) | <i>six1a</i>       | ENSDARP00000057431 |
|                                                          |                                  | <i>six1b</i>       | ENSDARP00000028379 |
|                                                          |                                  | <i>six2a</i>       | ENSDARP00000075251 |
|                                                          |                                  | <i>six2b</i>       | ENSDARP00000071623 |
| <i>six3a</i>                                             |                                  | ENSDARP00000075254 |                    |
| <i>six3b</i>                                             |                                  | ENSDARP00000071625 |                    |
| <i>six4a</i>                                             |                                  | ENSDARP00000126511 |                    |
| <i>six4b</i>                                             |                                  | ENSDARP00000104361 |                    |
| <i>six4.3</i>                                            |                                  | ENSDARP00000123087 |                    |
| <i>six6a</i>                                             |                                  | ENSDARP00000098430 |                    |
| <i>six6b</i>                                             |                                  | ENSDARP00000110487 |                    |
| <i>six7</i>                                              |                                  | ENSDARP00000093395 |                    |
| medaka ( <i>Oryzias latipes</i> )                        |                                  | <i>six1b</i>       | ENSORLP00000019739 |
|                                                          | <i>six2a</i>                     | ENSORLP00000005562 |                    |
|                                                          | <i>six3a</i>                     | ENSORLP00000005568 |                    |
|                                                          | <i>six3b</i>                     | ENSORLP00000012924 |                    |
|                                                          | <i>six4b</i>                     | ENSORLP00000019732 |                    |
|                                                          | <i>six5</i>                      | ENSORLP00000008488 |                    |
|                                                          | <i>six6</i>                      | ENSORLP00000019744 |                    |
| spotted gar ( <i>Lepisosteus oculatus</i> )              | <i>six7</i>                      | ENSORLP00000010004 |                    |
|                                                          | <i>six1</i>                      | ENSLOCP00000012336 |                    |

|                                              |               |                    |
|----------------------------------------------|---------------|--------------------|
|                                              | <i>six2</i>   | ENSLOCP00000020213 |
|                                              | <i>six3</i>   | ENSLOCP00000020214 |
|                                              | <i>six4</i>   | ENSLOCP00000012349 |
|                                              | <i>six5</i>   | ENSLOCP00000018274 |
|                                              | <i>six6</i>   | ENSLOCP00000012326 |
|                                              | <i>six7</i>   | ENSLOCP00000001894 |
| elephantshark ( <i>Callorhynchus milii</i> ) | <i>SIX1</i>   | SINCAMP00000004524 |
|                                              | <i>SIX2</i>   | SINCAMP00000018264 |
|                                              | <i>SIX3</i>   | SINCAMP00000012754 |
|                                              | <i>SIX4</i>   | SINCAMP00000004532 |
|                                              | <i>SIX6</i>   | SINCAMP00000004521 |
| lamprey ( <i>Petromyzon marinus</i> )        | <i>SIX3</i>   | ENSPMAP00000002840 |
| nematode ( <i>Caenorhabditis elegans</i> )   | <i>ceh-34</i> | C10G8.6            |

---

### Supplementary table 5.

Ensembl accession numbers used for alignment of the members of the green cone opsins in ray-finned fish.

| Vertebrate species                            | Gene          | Ensembl accession number |
|-----------------------------------------------|---------------|--------------------------|
| zebrafish ( <i>Danio rerio</i> )              | <i>rh2-1</i>  | ENSDARP00000001158       |
|                                               | <i>rh2-2</i>  | ENSDARP000000011837      |
|                                               | <i>rh2-3</i>  | ENSDARP00000001943       |
|                                               | <i>rh2-4</i>  | ENSDARP00000000979       |
| cod ( <i>Gadus morhua</i> )                   | <i>rh2-1</i>  | ENSGMOP00000018628       |
|                                               | <i>rh2-2</i>  | ENSGMOP00000018611       |
| fugu ( <i>Takifugu rubripes</i> )             | <i>rh2-2</i>  | ENSTRUP00000005472       |
| stickleback ( <i>Gasterosteus aculeatus</i> ) | <i>rh2-1</i>  | ENSGACP00000001857       |
|                                               | <i>rh2-2</i>  | ENSGACP00000001853       |
| tilapia ( <i>Oreochromis niloticus</i> )      | <i>rh2-1</i>  | ENSONIP00000005294       |
|                                               | <i>rh2-2</i>  | ENSONIP00000005293       |
|                                               | <i>rh2-3</i>  | ENSONIP00000005291       |
| platyfish ( <i>Xiphophorus maculatus</i> )    | <i>rh2-1</i>  | ENSXMAP00000015304       |
|                                               | <i>rh2-2</i>  | ENSXMAP00000015295       |
| medaka ( <i>Oryzias latipes</i> )             | <i>kfh-g</i>  | ENSORLP00000024943       |
|                                               | <i>rh2-b1</i> | ENSORLP00000024987       |
|                                               | <i>rh2-b2</i> | ENSORLP00000024993       |
| spotted gar ( <i>Lepisosteus oculatus</i> )   | <i>rh2</i>    | ENSLOCP00000015272       |

## Supplementary figure legends

**Supplementary figure 1.** Characterization of *six7* and/or *six3b* knock-out zebrafish. (a) *Top*, exon-intron organization and partial nucleotide sequences of *six7* gene in zebrafish. The binding sites of the left and right TALENs are highlighted in *blue*. The recognition site of the endonuclease *XhoI* is highlighted in *green*. *Bottom*, the nucleotide sequences of the *six7* KO alleles (ja51, ja52, and ja54) are compared with the WT sequence. Deletions are indicated by dashes. (b) Expression profiles of phototransduction component genes in *six7*<sup>ja52/ja52</sup> knock-out zebrafish at ~4.5 dpf. The ocular RNA (50 ng for the larval eye) was reverse-transcribed into cDNA, and the cDNA was subjected to quantitative PCR. The data were represented by mean + SEM (n = 5). Statistical significance between WT (+/+) and *six7* KO data (ja52/ja52) is shown as the asterisks (\*,  $p < 0.05$  by Student's *t*-test). (c) *Top*, exon-intron organization and partial nucleotide sequences of *six3b* gene in zebrafish. The binding sites of the left and right TALENs are highlighted in *blue*. The recognition site of the endonuclease *HindIII* is highlighted in *green*. *Bottom*, the nucleotide sequences of the *six3b* KO alleles (ja53 and ja55) are compared with the WT sequence. Deletions are indicated by dashes. (d) Genotyping of *six3b* knock-out zebrafish by a combination of PCR and subsequent digestion by endonuclease *HindIII*. (e) Whole body images of the larval zebrafish at 2 dpf (*top*). The larvae were obtained from crossing of *six7*<sup>ja52/+</sup>; *six3b*<sup>ja53/+</sup> fish. The images were taken with a stereoscopic microscope (MZ-FL3, Leica) and subjected to measurement of the eye area with ImageJ software (*bottom*). The data shown in the *bottom* panel



were represented by mean + SEM. The number of the zebrafish used for the quantification was indicated in the bar graph. Scale bar, 200  $\mu\text{m}$ .

**Supplementary figure 2.** Related to figure 4b. The images of *dorsal*, *central* and *ventral* retina were demagnified from those in figure 4b. The cone opsin genes were expressed in the photoreceptor layer (white arrowheads), which is adjacent to the retinal pigmented epithelium (RPE, black arrowheads). In the images of the central retina, the dorsal side (*D*) is to the left, and the ventral (*V*) is to the right. Scale bar, 100  $\mu\text{m}$ .

**Supplementary figure 3.** Expression levels of transcription factors contributing to the photoreceptor development in mouse and/or zebrafish in the WT and *six7* KO eyes at 3 mpf. The mRNA levels were quantified by RT-qPCR. The data were represented by mean + SEM ( $n = 4$ ). Statistical significance between WT and *six7* KO data is shown as the asterisks (\*,  $p < 0.05$  by Student's *t*-test)

**Supplementary figure 4.** Expression patterns of *lws1* and *lws2* in WT and *six7* KO retina. (a, b) The expression of two red opsin genes, *lws1* and *lws2*, was visualized by *in situ* hybridization. (a) Cryosections were prepared from the larval zebrafish at 3.5 dpf, which was the same developmental stage as in figure 3f. The *lws1* expression was detected only in KO retina (arrowheads). Note that the photoreceptor layer is adjacent to the RPE (black arrowheads). *D*, dorsal side. *V*, ventral side. Scale bar, 50  $\mu\text{m}$ . (b) Related to figure 4b. Cryosections were prepared from the eye of WT or *six7* KO at 3 mpf, which was the same

developmental stage as in figure 4a and figure S3. RPE is indicated by asterisks. Scale bar, 30  $\mu\text{m}$ . (c) Fluorescent images of the flat-mounted retina which were prepared from the 6 mpf-WT and KO and immunostained with the anti-Gnat2 antibody for all the subtypes of cones (*green*; panel 3, 4) and with the 1D4 antibody for the red cones (magenta; panel 1, 2). Merged images are shown on panel 5 and panel 6, while their magnified images are on panel 5' and 6'. The images were taken from the outside of the retina with focusing on the layer corresponding to the outer segment of the double cone in the central retina. Scale bar, 30  $\mu\text{m}$ .

**Supplementary figure 5.** Expression levels of the opsin genes in WT (+/+) and *six3b* knock-out zebrafish (*ja53/ja53*) at 5 dpf. The ocular RNA (120 ng for the larval eye) was reverse-transcribed into cDNA, and the cDNA was subjected to quantitative PCR. The data were represented by mean + SEM ( $n = 5$ ). Statistical significance ( $p < 0.05$ , Student's *t*-test) was not detected between WT and *six3b* KO for any of the genes.

**Supplementary figure 6.** Phylogenetic tree and sequence alignment of the members in Six family including reptilian SIX7 proteins. (a) A Neighbour-Joining (NJ) tree was constructed from amino acid sequences of SIX domain and homeodomain with 1,000 bootstrapping replications. Numerical values indicating bootstrap support are shown at the base of each node. Nematode CEH-34 was employed as an outgroup. The tree was generated with reptilian SIX7 protein sequences of Chinese soft-shell turtle, green anole, green sea turtle and Indian

python. Scale bar, 0.200 substitutions per site. (b) Sequence alignment of Six protein family. Note that in the SIX domain, the reptilian SIX7 proteins are poorly aligned with all the other members of Six protein family. The asterisks represent the four residues forming the homeobox nucleic acid recognition domain (HD) recognition helix.

**Supplementary figure 7.** Genomic environment of the green cone opsin genes in vertebrates. Orthologous genes contributing to the conserved synteny are similarly colour-coded. See also supplementary figure 8 for genomic environment of the green cone opsin genes of teleost including additional species. The comparative analysis revealed that the chromosomal locations of the green cone opsin genes can be classified into two types, (i) the non-teleost type and (ii) the teleost type. The former synteny (i) (upper half) is characterized by the presence of a series of the genes such as *IP6K3* and *LEMD2* in close proximity to *RH2*, and is found in the non-teleost species ranging from elephant shark to tetrapod. Note that elephant shark was diverged at the most ancient period from the other vertebrate species indicated in this figure, suggesting the “non-teleost type” synteny to represent an ancient type. The latter synteny (ii) (bottom half) is characterized by an array of different genes (such as *slc6a13* and *fkbp5*) neighbouring *rh2*, and is found in the teleost species. Note that spotted gar, the closest relative to teleost retaining *six7*, has the intermediate-type synteny around the green cone opsin gene. The synteny of spotted gar suggests that the genes around *rh2* was rearranged at least twice in the teleost lineage, *i.e.*, before and after the separation from spotted gar as represented by the node “a” and “b”,

respectively. This first rearrangement may predate the third-round whole genome duplication (3R), which is hypothesized to have occurred in the teleost lineage after separation (at node a) from the lineage leading to spotted gar [9]. An arrow in grey indicates an incompletely annotated green cone opsin gene, which perhaps is a pseudogene. Elephant shark, *Callorhinchus milii*; zebrafish, *Danio rerio*; medaka, *Oryzias latipes*; fugu, *Takifugu rubripes*; spotted gar, *Lepisosteus oculatus*; coelacanth, *Latimeria chalumnae*; anole lizard, *Anolis carolinensis*; chicken, *Gallus gallus*; human, *Homo sapiens*.

**Supplementary figure 8.** Phylogenetic tree of the members in teleost green cone opsins (a) and genomic environment of the green cone opsin genes in teleost (b). (a) A Neighbour-Joining (NJ) tree was constructed from the amino acid sequences of the green cone opsins without N terminal and C terminal regions with 1,000 bootstrapping replications. Numerical values indicating bootstrap support are shown at the base of each node. Closed and open circles on the nodes indicate the intraspecific (*closed*) and interspecific (*open*) duplication of green opsin genes. Spotted gar Rh2 was used as outgroup. The scale bar indicates the number of amino acid substitutions per site. Teleost Rh2 was separated into three groups: Rh2-A/B, Rh2-A and Rh2-B. (b) Genomic neighbourhood of the green opsin genes are compared among teleost species, whose phylogeny is presented in the left side. Different green opsin gene groups were indicated with distinct colours, i.e., *yellow* for Rh2-A/B, *blue* for Rh2-A, and *pink* for Rh2-B. Arrows surrounded by broken line indicate incompletely annotated green opsin genes, which might be pseudogenes. Cross marks in the

species phylogeny indicate the local duplication of the green opsin genes.

Zebrafish, *Danio rerio*; medaka, *Oryzias latipes*; cod, *Gadus morhua*; fugu, *Takifugu rubripes*; stickleback, *Gasterosteus aculeatus*; tilapia, *Oreochromis niloticus*; platyfish, *Xiphophorus maculatus*.

### Supplementary material 1.

The nucleotide sequence of pTAL7DD vector. For generating pTAL7RR vector, two codons in FokI nuclease catalytic domain (underlined) were changed from GAT (D) to AGA (R).

>pTAL7DD

```
CGCCATTCTGCCTGGGGACGTCGGAGCAAGCTTGATTTAGGTGACACTATAGAATACA
AGCTACTTGTCTTTTTGCAGGATCGCCACCATGGCTTCCTCCCCTCCAAAGAAAAG
AGAAAGGTTGATTACAAGGATGACGACGATAAGGTGGATCTACGCACGCTCGGCTACA
GTCAGCAGCAGCAAGAGAAGATCAAACCGAAGGTGCGTTTCGACAGTGGCGCAGCACCA
CGAGGCACTGGTGGGCCATGGGTTTACACACGCGCACATCGTTGCGCTCAGCCAACAC
CCGGCAGCGTTAGGGACCGTCGCTGTCACGTATCAGCACATAATCACGGCGTTGCCAG
AGGCGACACACGAAGACATCGTTGGCGTCGGCAAACAGTGGTCCGGCGCACGCGCCCT
GGAGGCCTTGCTCACGGATGCGGGGAGTTGAGAGGTCCGCCGTTACAGTTGGACACA
GGCCAACCTTGTGAAGATTGCAAACGTGGCGCGTGACCGCAATGGAGGCAGTGCATG
CATCGCGCAATGCACTGACGGGTGCCCCCTGGAGACGGGCGCCGCTACAGGGCGCGT
CCCATTTCGCCATTCAGGCTGCGCAACTGTTGGGAAGGGCGATCGGTGCGGGCCTCTTC
GCTATTACGCCAGCTGGCGAAAGGGGGATGTGCTGCAAGGCGATTAAGTTGGGTAACG
CCAGGGTTTTCCAGTCACGACGTTGTAAAACGACGGCCAGTGAGCGCGCGTAATACG
ACTCACTATAGGGCGAATTGGGTACCGGGCCCCCCTCGAGGTCCTCCAGCTTTTGTT
CCCTTTAGTGAGGGTTAATTGCGCGCTTGGCGTAATCATGGTCATAGCTGTTTCCTGT
GTGAAATTGTTATCCGCTCACAATTCCACACAACATACGAGCCGGAAGCATAAAGTGT
AAAGCCTGGGGTGCCTAATGAGTGAGCTAACTCACATTAATTGCGTTGCGCTCACTGC
CCGCTTTCACCGGTCGTCTCAAACGACCACCTCGTCGCCTTGGCCTGCCTCGGCGGA
CGTCTTGCCATGGATGCAGTGAAAAAGGGATTGCCGCACGCGCCGGAATTGATCAGAA
GAGTCAATCGCCGTATTGGCGAACGCACGTCCCATCGCGTTGCCGGATCCCAGCTAGT
GAAATCTGAATTGGAAGAGAAGAAATCTGAACTTAGACATAAATTGAAATATGTGCCA
CATGAATATATTGAATTGATTGAAATCGCAAGAAATTCAACTCAGGATAGAATCCTTG
AAATGAAGGTGATGGAGTTCTTTATGAAGGTTTATGGTTATCGTGGTAAACATTTGGG
TGGATCAAGGAAACCAGACGGAGCAATTTATACTGTCCGATCTCCTATTGATTACGGT
GTGATCGTTGATACTAAGGCATATTCAGGAGGTTATAATCTTCCAATTGGTCAAGCAG
ATGAAATGCAAGATTATGTGCGAAGAGAATCAAACAAGAAACAAGCATATCAACCCTAA
TGAATGGTGGAAAGTCTATCCATCTTCAGTAACAGAATTTAAGTTCTTGTTTGTGAGT
GGTCATTTCAAAGGAAACTACAAAGCTCAGCTTACAAGATTGAATCATATCACTAATT
GTAATGGAGCTGTTCTTAGTGTAGAAGAGCTTTTGATTGGTGGAGAAATGATTAAAGC
```

TGGTACATTGACACTTGAGGAAGTGAGAAGGAAATTTAATAACGGTGAGATAAACTTT  
TAATAGGAGCTCAATCAAGGCCTCTCGAGCCTCTAGAACTATAGTGAGTCGTATTAC  
GTAGATCCAGACATGATAAGATACATTGATGAGTTTGGACAAACCACAACCTAGAATGC  
AGTGAAAAAATGCTTTATTTGTGAAATTTGTGATGCTATTGCTTTATTTGTAACCAT  
TATAAGCTGCAATAAACAAGTTAACAACAACAATTGCATTCATTTTATGTTTCAGGTT  
CAGGGGGAGGTGTGGGAGGTTTTTTAATTCGCGGCCGCGGCGCCAATGCATTGGGCCC  
GGTACCCAGCTTTTGTTCCTTTAGTGAGGGTTAATTGCGCGCTTGCGTAATCATGG  
TCATAGCTGTTTCCTGTGTGAAATTGTTATCCGCTCACAATTCCACACAACATACGAG  
CCGAAGCATAAAGTGTAAGCCTGGGGTGCCTAATGAGTGAGCTAACTCACATTAAT  
TGCGTTGCGCTCACTGCCCCGCTTTCCAGTCGGGAAACCTGTCGTGCCAGCTGCATTAA  
TGAATCGGCCAACGCGCGGGGAGAGGCGGTTTGCGTATTGGGCGCTCTCCGCTTCCT  
CGCTCACTGACTCGCTGCGCTCGGTCGTTTCGGCTGCGGCGAGCGGTATCAGCTCACTC  
AAAGGCGGTAATACGTTTATCCACAGAATCAGGGGATAACGCAGGAAAGAACATGTGA  
GCAAAGGCCAGCAAAGGCCAGGAACCGTAAAAAGGCCGCGTTGCTGGCGTTTTTCC  
ATAGGCTCCGCCCCCTGACGAGCATCACAATAATCGACGCTCAAGTCAGAGGTGGCG  
AAACCCGACAGGACTATAAAGATACCAGGCGTTTCCCCCTGGAAGCTCCCTCGTGCGC  
TCTCCTGTTCCGACCCTGCCGCTTACCGGATACCTGTCCGCCTTTCTCCCTTCGGGAA  
GCGTGGCGCTTTCTCATAGCTCACGCTGTAGGTATCTCAGTTCGGTGTAGGTGTTTCG  
CTCCAAGCTGGGCTGTGTGCACGAACCCCCGTTTCAGCCCGACCGCTGCGCCTTATCC  
GGTAACTATCGTCTTGAGTCCAACCCGGTAAGACACGACTTATCGCCACTGGCAGCAG  
CCACTGGTAACAGGATTAGCAGAGCGAGGTATGTAGGCGGTGCTACAGAGTTCTTGAA  
GTGGTGGCCTAACTACGGCTACACTAGAAGGACAGTATTTGGTATCTGCGCTCTGCTG  
AAGCCAGTTACCTTCGAAAAAGAGTTGGTAGCTCTTGATCCGGCAAACAACCACCG  
CTGGTAGCGGTGGTTTTTTTTGTTTGCAAGCAGCAGATTACGCGCAGAAAAAAGGATC  
TCAAGAAGATCCTTTGATCTTTTCTACGGGGTCTGACGCTCAGTGGAACGAAAACTCA  
CGTTAAGGGATTTTGGTCATGAGATTATCAAAAAGGATCTTCACCTAGATCCTTTTAA  
ATTAATAATGAAGTTTTAAATCAATCTAAAGTATATATGAGTAAACTTGGTCTGACAG  
TTACCAATGCTTAATCAGTGAGGCACCTATCTCAGCGATCTGTCTATTTTCGTTTATCC  
ATAGTTGCCTGACTCCCCGTCGTGTAGATAACTACGATACGGGAGGGCTTACCATCTG  
GCCCCAGTGCTGCAATGATACCGCGAGACCCACGCTCACCGGCTCCAGATTTATCAGC  
AATAAACAGCCAGCCGGAAGGGCCGAGCGCAGAAGTGGTCCTGCAACTTTATCCGCC  
TCCATCCAGTCTATTAATTGTTGCCGGAAGCTAGAGTAAGTAGTTCGCCAGTTAATA  
GTTTGCGCAACGTTGTTGCCATTGCTACAGGCATCGTGGTGTACGCTCGTCGTTTGG  
TATGGCTTCATTCAGCTCCGGTTCCCAACGATCAAGGCGAGTTACATGATCCCCATG  
TTGTGCAAAAAGCGGTTAGCTCCTTCGGTCTCCGATCGTTGTCAGAAGTAAGTTGG  
CCGAGTGTATCACTCATGTTTATGGCAGCACTGCATAATTCTCTTACTGTCATGCC  
ATCCGTAAGATGCTTTTCTGTGACTGGTGAAGTCAACCAAGTCATTCTGAGAATAG  
TGTATGCGGCGACCGAGTTGCTCTTGCCCGCGTCAATACGGGATAATACCGCGCCAC  
ATAGCAGAACTTTAAAAGTGCTCATCATTGGAAAACGTTCTTCGGGGCGAAAACCTC  
AAGGATCTTACCGCTGTTGAGATCCAGTTCGATGTAACCCACTCGTGACCCAACTGA  
TCTTCAGCATCTTTTACTTTACCAGCGTTTCTGGGTGAGCAAAAACAGGAAGGCAA  
ATGCCGCAAAAAGGGAATAAGGGCGACACGGAAATGTTGAATACTCATACTCTTCCT  
TTTTCAATATTATTGAAGCATTATCAGGGTTATTGTCTCATGAGCGGATACATATTT  
GAATGTATTTAGAAAAATAAACAATAAGGGGTTCCGCGCACATTTCCCCGAAAAGTGC  
CACCTAAATTGTAAGCGTTAATATTTTGTAAAATTCGCGTTAAATTTTTGTTAAATC  
AGCTCATTTTTTAACCAATAGGCCGAAATCGGCAAAATCCCTTATAAATCAAAAAGAA  
AGACCGAGATAGGGTTGAGTGTGTTCCAGTTTGAACAAGAGTCCACTATTAAAGAA  
CGTGGACTCCAACGTCAAAGGGCGAAAACCGTCTATCAGGGCGATGGCCCACTACGT

GAACCATCACCTAATCAAGTTTTTTGGGGTCGAGGTGCCGTAAAGCACTAAATCGGA  
ACCCTAAAGGGAGCCCCGATTTAGAGCTTGACGGGGAAAGCCGGCGAACGTGGCGAG  
AAAGGAAGGGAAGAAAGCGAAAGGAGCGGGCGCTAGGGCGCTGGCAAGTGTAGCGGTC  
ACGCTGCGCGTAACCACCACACCCGCCGCGCTTAATGCGCCGCTACAGGGCGCGTCCC  
ATTCGCCATTCAGGCTGCGCAACTGTTGGGAAGGGCGATCGGTGCGGGCCTCTTCGCT  
ATTACGCCAGTCGACCATAGCCAATTC AATATGGCGTATATGGACTCATGCCAATTCA  
ATATGGTGGATCTGGACCTGTGCCAATTC AATATGGCGTATATGGACTCGTGCCAATT  
CAATATGGTGGATCTGGACCCCAGCCAATTC AATATGGCGGACTTGGCACCATGCCAA  
TTCAATATGGCGGACTTGGCACTGTGCCAACTGGGGAGGGGTCTACTTGGCACGGTGC  
CAAGTTTGAGGAGGGTCTTGGCCCTGTGCCAAGTCCGCCATATTGAATTGGCATGGT  
GCCAATAATGGCGGCCATATTGGCTATATGCCAGGATCAATATATAGGCAATATCCAA  
TATGGCCCTATGCCAATATGGCTATTGGCCAGGTTCAATACTATGTATTGGCCCTATG  
CCATATAGTATTCCATATATGGGTTTTCTATTGACGTAGATAGCCCCTCCCAATGGG  
CGGTCCCATATACCATATATGGGGCTTCTAATACCGCCCATAGCCACTCCCCATTG  
ACGTCAATGGTCTCTATATATGGTCTTTCTATTGACGTCATATGGGCGGTCTTATTG  
ACGTATATGGCGCCTCCCCCATTGACGTCAATTACGGTAAATGGCCCGCCTGGCTCAA  
TGCCCATTTGACGTCAATAGGACCACCCACCATTGACGTCAATGGGATGGCTCATTGCC  
CATT CATATCCGTTCTCACGCCCCCTATTGACGTCAATGACGGTAAATGGCCCACTTG  
GCAGTACATCAATATCTATTAATAGTAACTTGGCAAGTACATTACTATTGGAAGGACG  
CCAGGGTACATTGGCAGTACTCCCATTTGACGTCAATGGCGGTAAATGGCCCGCGATGG  
CTGCCAAGTACATCCCCATTGACGTCAATGGGGAGGGGCAATGACGCAAATGGGCGTT  
CCATTGACGTAAATGGGCGGTAGGCGTGCC AATGGGAGGTCTATATAAGCAATGCTC  
GTTTAGGGAAC

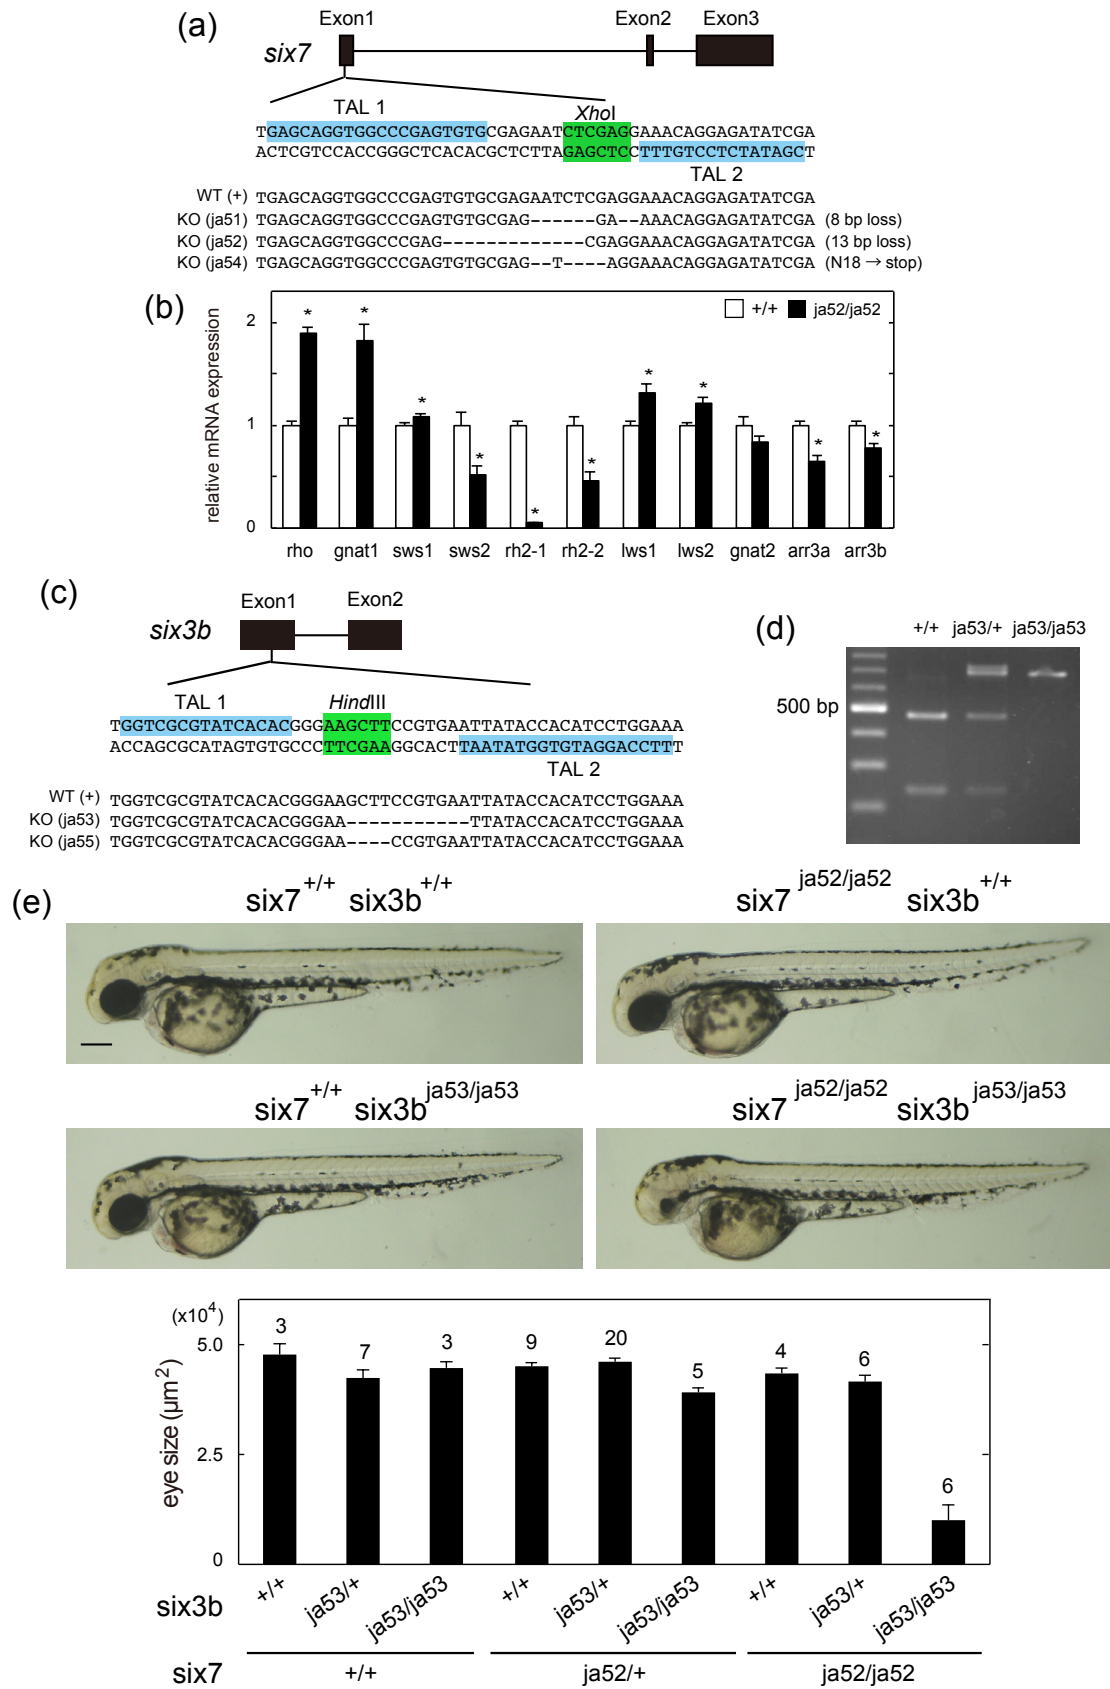

Figure S1



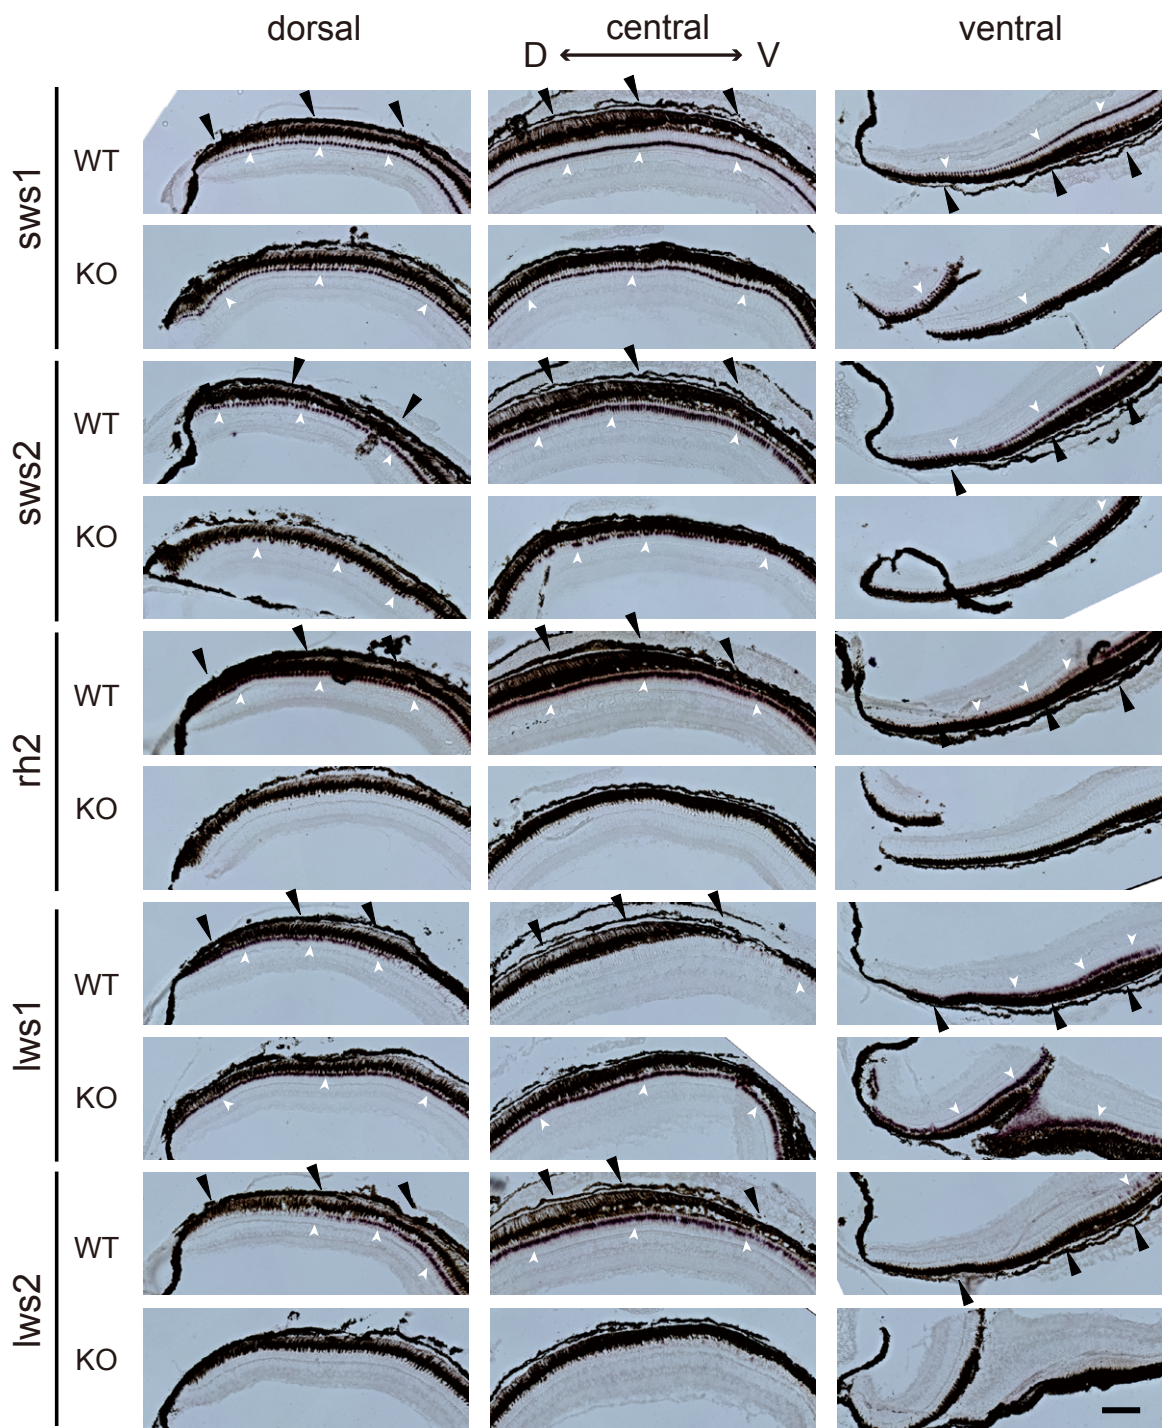

4 mpf  
 Figure S2

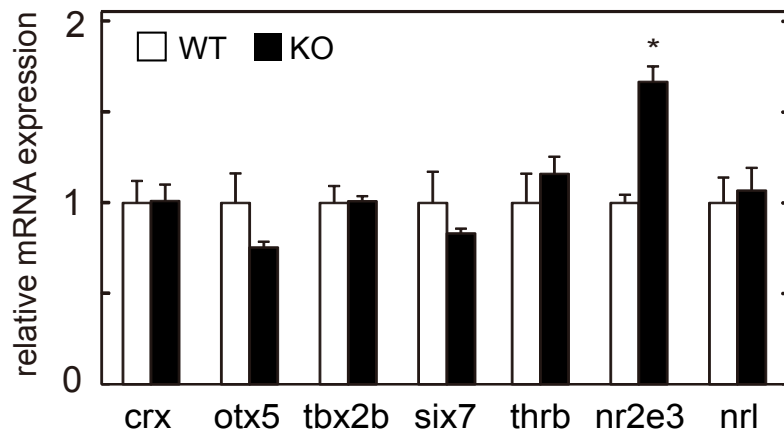

Figure S3

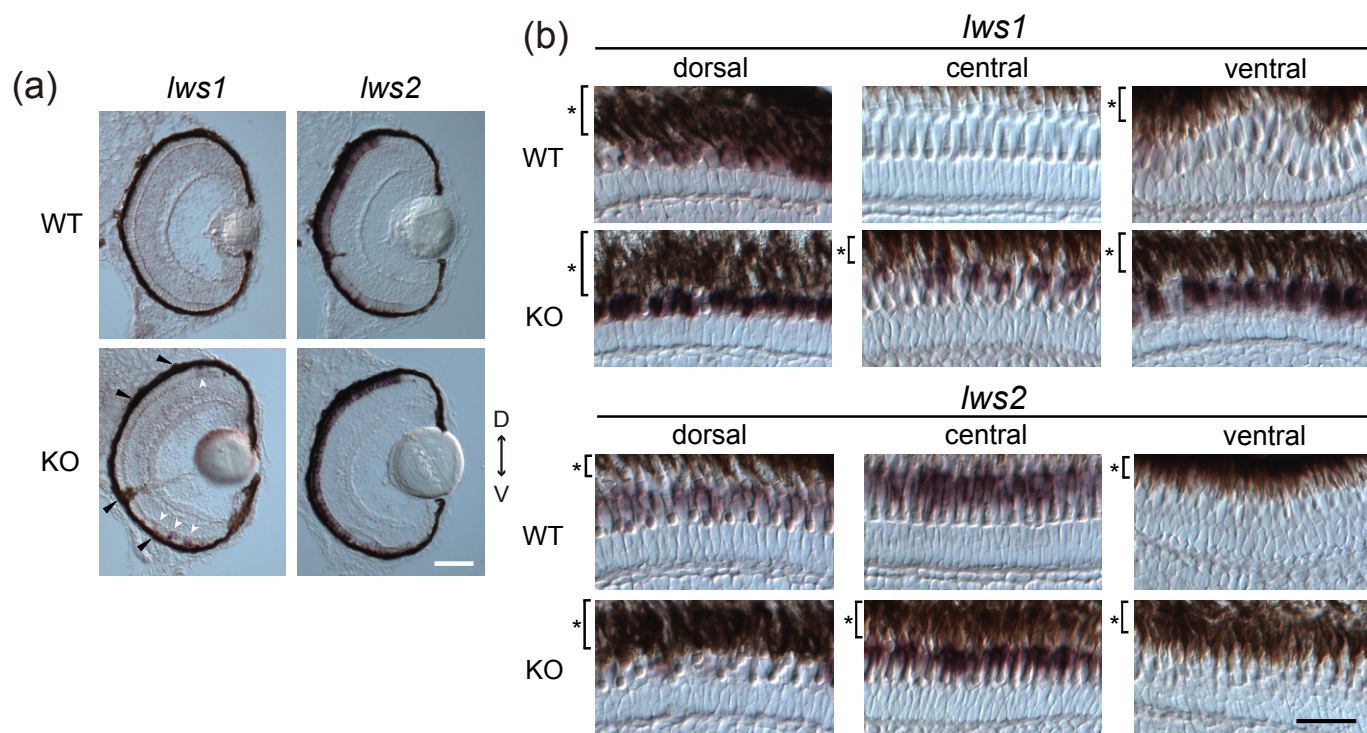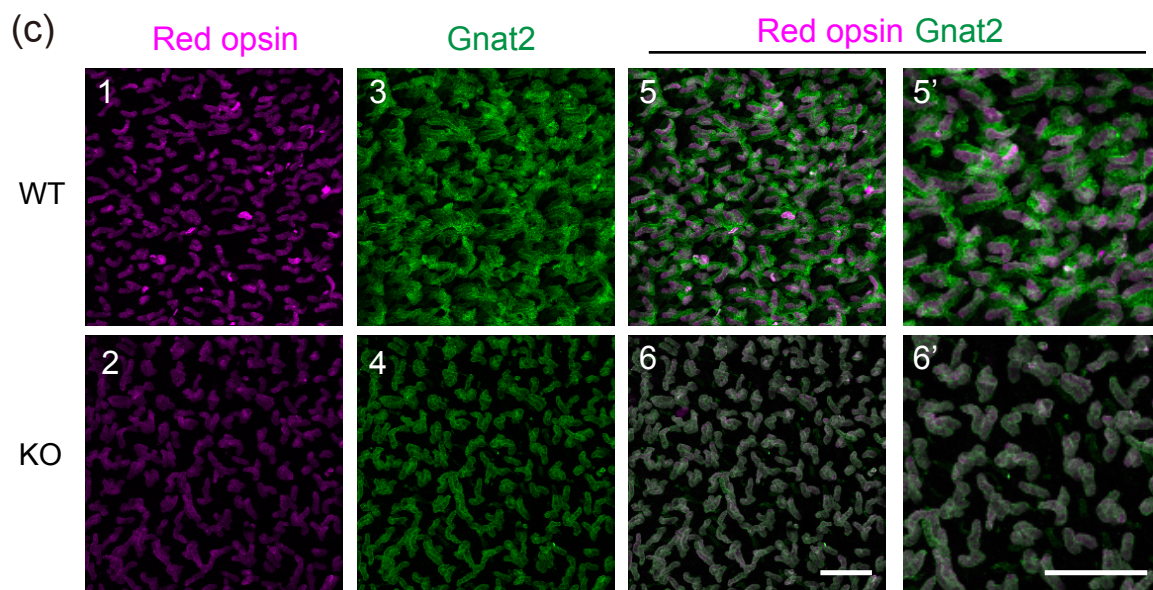

Figure S4

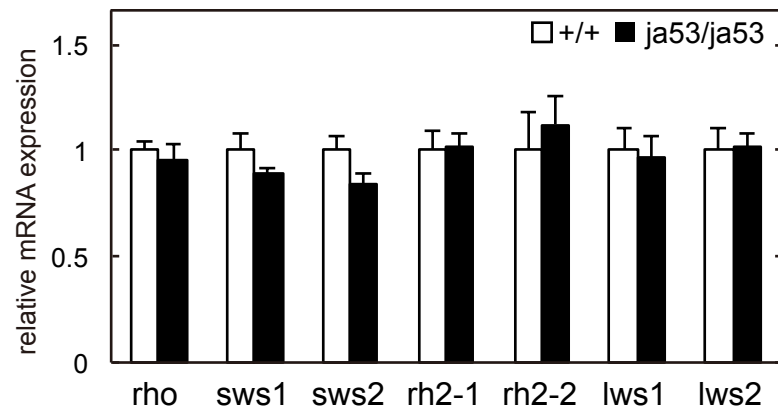

Figure S5

(a)

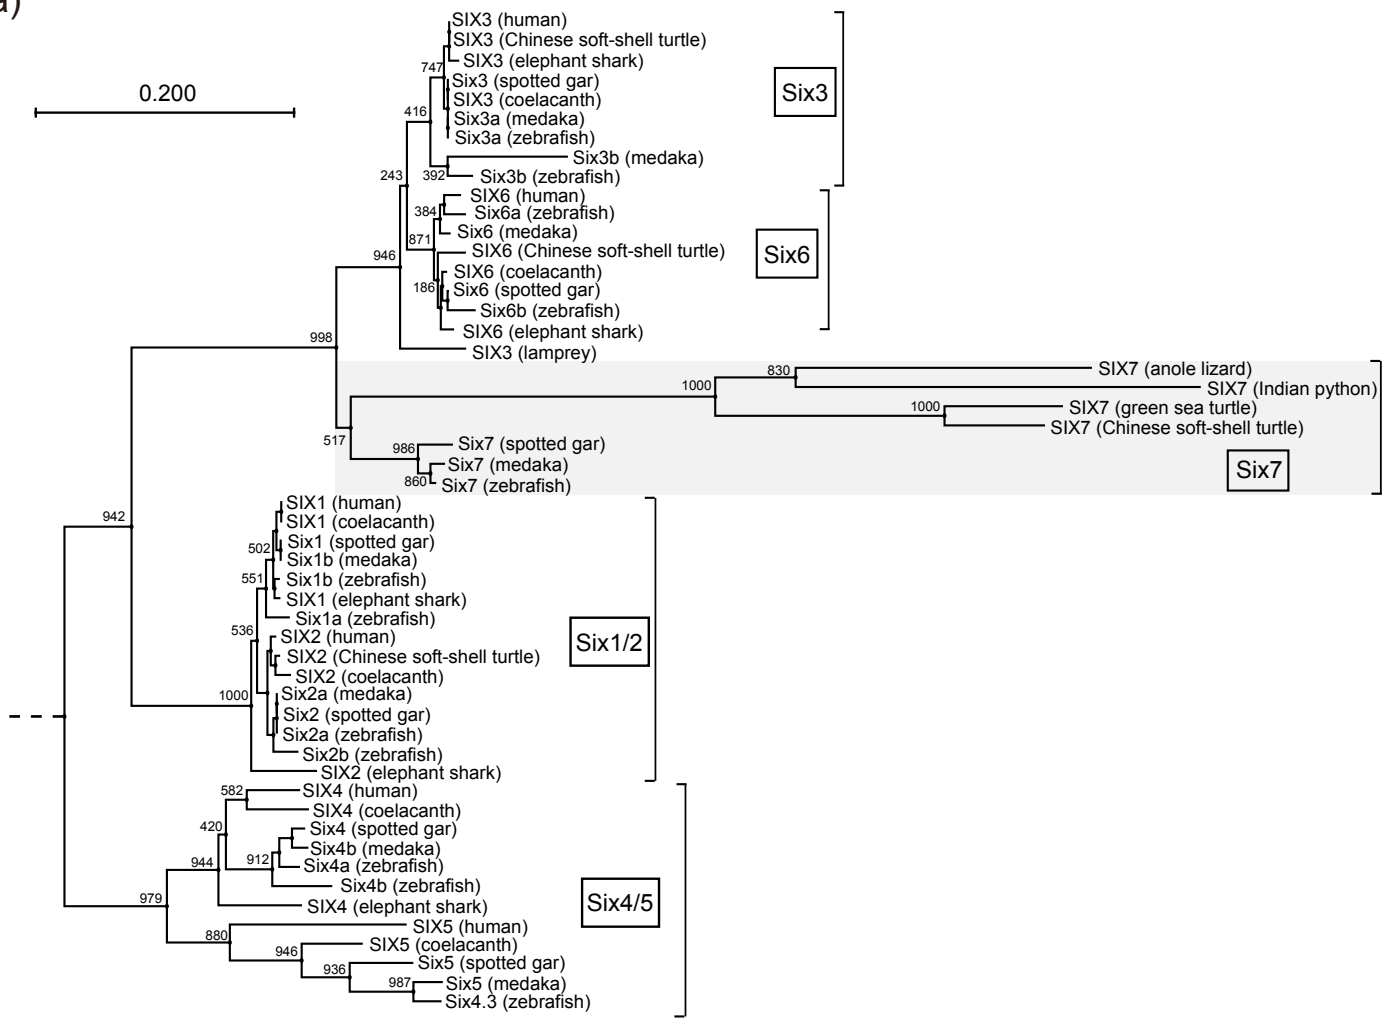

Figure S6



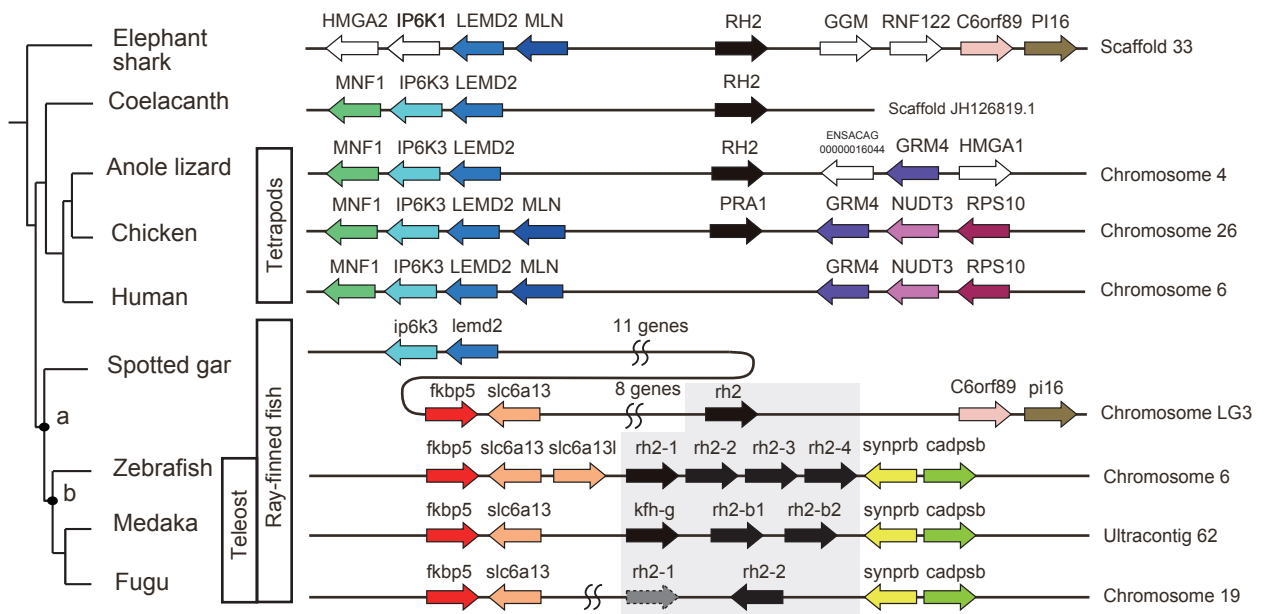

Figure S7

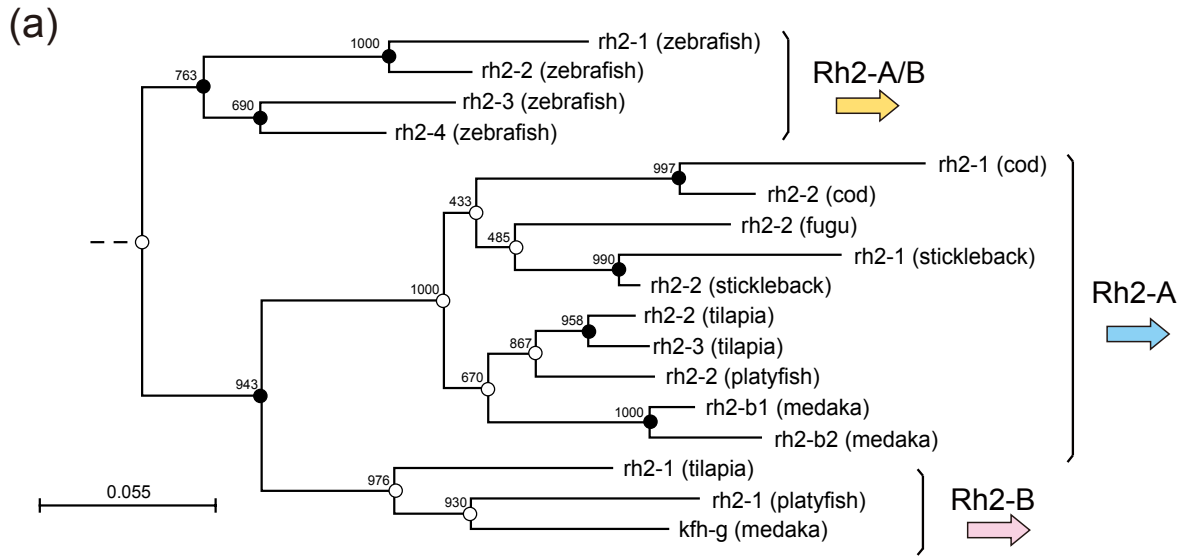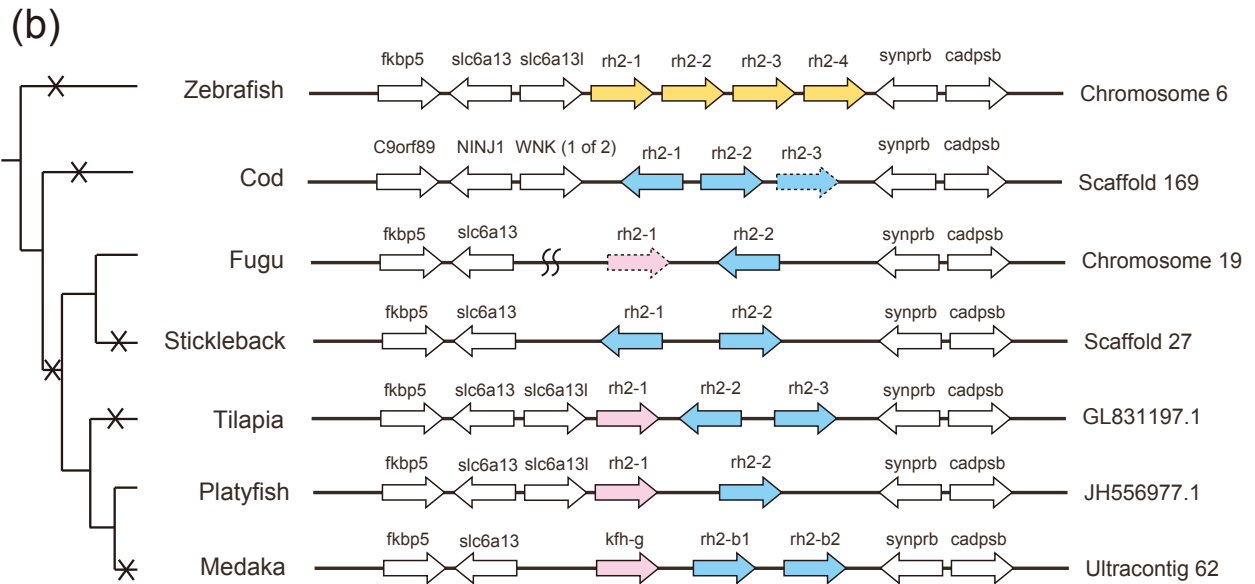

Figure S8
